# Supplementary material for: Loss of intra-islet heparan sulfate is a highly sensitive marker of type 1 diabetes progression in humans
Source: PLoS One. 2018 Feb 7;13(2):e0191360. doi: 10.1371/journal.pone.0191360 (PMC5802856; doi:10.1371/journal.pone.0191360)
Supplement: S1 Table — (XLSX) [file pone.0191360.s006.xlsx]

## Sheet: Sheet1
S1 Table.	Percentage of islet area stained for HS, HSPGs (Col18 and Sdc1), insulin and glucagon in normal healthy and T1D human pancreases
Normal	% islet area staineda,d					T1D	% islet area staineda,d
pancreas IDb	HS	Col18	Sdc1	Insulin	Glucagon	pancreas ID	HS	Col18	Sdc1	Insulin	Glucagon
#6134	22.967	40.814	18.142	29.76	7.367	#6209	13.915	12.089	18.756	43.507	11.133
	24.642	42.973	21.474	37.689	15.614		7.777	13.892	12.341	41.311	12.937
	20.007	35.29	17.817	33.194	15.117		14.813	9.021	18.551	42.015	18.487
	24.745	36.382	13.87	26.482	17.673		9.23	29.919	11.037	44.842	6.736
	27.268	47.993	25.263	41.32	8.33		5.004	20.05	28.498	20.487	8.152
	20.891	53.662	25.163	50	9.292		2.188	20.579	9.96	38.21	12.325
	27.04	50.902	17.669	34.091	3.594		3.714	10.052	5.28	14.724	8.86
	14.842	39.981	25.331	29.329	16.76		2.296	28.756	18.986	37.605	1.62
	15.956	39.04	30.905	28.37	11.907		1.782	9.35		32.504	16.133
		24.077	11.055	23.455	27.578		14.863	21.711		33.666	22.509
								6.077		36.627	13.244
#6129	18.367	19.332	ndc	36.236	18.245	#6212	2.704	19.005	nd	32.563	9.436
	22.586	29.566		49.899	21.375		7.553	33.942		40.799	19.565
	13.82	19.065		29.278	12.745		6.587	29.077		35.648	12.52
	12.506	21.151		26.602	9.714		6.612	34.216		26.166	13.096
	14.178	21.368		24.576	4.139			25.595		27.842	5.632
	9.382	14.268		14.948	12.7
	19.316	20.665		20.333	5.617
	14.853	16.358		21.857	11.644
	21.137	20.01		23.753	10.36
	20.799	17.943		33.118	18.047
#6104	13.272	22.918	nd	17.231	14.563	#6084	4.624	18.886	11.584	29.186	39.533
	26.019	49.276		45.039	21.504		9.709	18.041	12.465	24.85	35.015
	14.646	24.715		29.43	23.372		14.649	17.39	18.349	42.407	14.126
	13.592	22.845		17.759	20.336		1.855	6.478	4.855	10.168	42.093
	11.655	19.052		25.425	12.862		6.603	11.439	12.088	38.7	11.006
	9.044	34.829		24.217	12.506		1.902	6.242	12.232	11.412	9.432
	20.01	38.278		32.997	19.306		0.253	18.759		47.602
	28.745	22.018		34.755	7.806
	7.669	30.353		24.815
	7.314			23.317
#6075	19.749	21.604	36.285	21.89	10.361	#6052	19.184	nd	nd	40.54	37.632
	22.639	27.237	27.827	22.582	12.243		15.414			54.022	17.257
	16.316	36.91	39.308	11.94	4.177		10.974			42.832	34.298
	26.156	22.917	27.834	15.83	5.313		3.052			42.999	18.846
	13.374	21.347	15.418	18.411	11.397		18.047			41.025
	19.015	22.659	34.256	14.437	6.013
	13.898	18.491	25.406	24.962	9.548
	16.474	15.507	31.025	32.012	8.235
	22.575		25.915	18.869	7.348
	9.054		30.521	14.528
#6094	24.096	37.946	13.84	28.091	10.835	#6069	7.11	nd	nd	42.989	2.077
	30.409	40.195	17.352	38.986	7.212		6.075			22.575	32.056
	21.18	24.827	16.13	28.017	6.525		11.63			20.186	39.786
	22.8	36.885	20.835	43.327	3.746		14.94			14.665	44.911
	20.06	35.079	13.78	32.205	9.329		26.734			32.75	33.968
	28.4	41.809	20.301	47.381	6.352		5.802			22.905	34.703
	20.181	38.85	15.668	40.96	5.098		8.297			13.85	26.3
	25.323	35.038	17.757	36.563	9.517		4.994			12.716
	26.87	23.792	14.691	34.889	10.375
	27.877	36.287	24.596	40.406	4.024
#6012	31.112	44.435	nd	26.883	10.293	#6198	8.698	14.922	3.664	16.638	4.063
	25.051	49.657		37.234	13.166		8.232	15.306	4.612	15.354	9.304
	19.788	46.386		35.87	9.358		4.407	27.171	2.203	39.6	10.825
	31.429	46.746		31.874	8.31		12.099	12.712	19.517	14.366	14.62
	28.314	44.728		49.634	3.248		10.557	16.974	12.377	21.848	7.832
	25.599	23.945		26.218	22.344			16.666	16.708	16.061	10.745
	29.047	46.176		28.831	13.81			19.424	11.903	31.749	5.411
	24.52	35.45		31.898	12.46			17.232	5.399	42.023	8.078
	20.398	28.929		22.99	12.139			5.486		15.252	7.215
	27.234	45.909		33.331						31.698
#6096	28.685	38.688	25.628	49.028	nd	#6070	6.313	21.738	5.968	27.201	24.445
	31.983	38.072	22.487	40.543			10.463	13.794	4.901	14.606	19.625
	31.087	38.155	27.855	54.289			10.064	24.533	11.039	27.001	15.314
	19.986	46.746	29.119	57.104			12.787	36.137	20.104	45.871	16.136
	23.179	40.521	26.451	58.162			17.687	38.392	12.664	34.833	16.339
	26.123	48.838	25.074	55.226			11.924	36.951	16.852	39.719	15.845
	18.247	52.384	24.95	60.138			19.988	35.124	13.266	40.074	13.502
	25.559	34.757	19.483	34.576			12.31	30.617	10.929	35.952	14.413
	16.167	35.507	17.121	52.763			9.86	19.686	8.004	14.516	21.075
	30.848	46.807	25.777	66.558				12.765	4.285	14.652	18.843
#6102	23.193	38.623	nd	38.692	nd	#6046	8.15	9.144	2.945	25.706	nd
	14.119	35.074		35.059			1.845	16.227	5.947	17.991
	24.27	27.832		28.128			3.659	11.734	5.282	20.478
	26.414	30.621		33.952			8.716	8.635	1.458	11.239
	26.886	34.455		37.334			12.456	7.017	0.432	10.785
	15.14	15.328		21.154			8.005	15.557	2.922	19.829
	24.569	27.66		31.236			2.01	9.368	3.668	15.202
	12.067	22.384		26.206			1.556	8.489	1.483	16.539
	30.817	30.162		30.957				15.398	2.369	12.842
	21.058	40.983		37.202				10.156	2.476	21.542
Mean±SEM	21.22±0.72	33.10±1.21	22.98±1.06	32.86±1.31	11.48±0.75	Mean±SEM	8.80±0.74	18.23±1.26	9.72±1.10	28.30±1.47	17.67±1.55
ne	79	77	40	80	56	n	56	52	42	66	52
a Each data point represents % islet area stained for an individual islet; where possible, the same islet was analysed after each different immunostain.
b nPOD human pancreas sample ID number
c nd, Not determined
d % islet area stained was determined using Image J software with color deconvolution plugin (see Materaials and Methods)
e n = number of islets examined
